# Supplementary material for: Impact of Anti-Inflammatory Agents on the Gene Expression Profile of Stimulated Human Neutrophils: Unraveling Endogenous Resolution Pathways
Source: PLoS One. 2009 Mar 19;4(3):e4902. doi: 10.1371/journal.pone.0004902 (PMC2654409; doi:10.1371/journal.pone.0004902)
Supplement: Table S5 — List of PCR primers. (0.16 MB XLS) [file pone.0004902.s005.xls]

## Sheet: Tableau des amorces-4
	Official Symbol	SEQUENCE (sense)	SEQUENCE (antisense)	LENGTH (bp)
	ADARB1	5'-CGACTTCCCTGACACGCTCT-3'	5'-AACTGACCATCCACGACCAC-3'	309
	ARHGDIA	5'-GAGAGCCTGCGAAAGTACAA-3'	5'-CTCCTTCAGCACAAACGACT-3'	183
	ATF3	5'-AAGTGAGTGCTTCTGCCATC-3'	5'-TCTTCTTCAGGGGCTACCTC-3'	220
	BIRC3	5'-TTTGCTGTGATGGTGGACTC-3'	5'-TGAACTTGACGGATGAACTC-3'	127
	BST2	5'-TGACTATTGCAGAGTGCCCA-3'	5'-TTGTTGCAGGAGATGGGTGA-3'	199
	BTG2	5'-ATTCGCATCAACCACAAGAT-3'	5'-TCCTCGTACAAGACGCAGAT-3'	173
	CD69	5'-TGCCATCAGACAGCCATGTT-3'	5'-TGACAGCAAGAGTAGCACCA	141
	CD83	5'-GGTTCCCTACACGGTCTCCT-3'	5'-ATTTTGCCCCTTCTGATGAT-3'	142
	CISH	5'-AGACAGAGAGTGAGCCAAAGGT-3'	5'-ACTGACAGCGTGAACAGGTA-3'	201
	CLEC7A	5'-CAATTACACTTCGACTCTCAAAGC-3'	5'-ATGGTACCCAGGACCACAG-3'	201
	COX-2	5'-TGCATTCTTTGCCCAGCACT-3'	5'-AAAGGCGCAGTTTACGCTGT-3'	146
	DDIT3	5'-TTCAGATGAAAATGGGGGTA-3'	5'-CTTGGTCTTCCTCCTCTTCC-3'	209
	DUSP1	5'-AGGAGGATACGAAGCGTTTT-3'	5'-GGTACAGAAAGGGCAGGATT-3'	182
	DUSP2	5'-CGCTGCCGCCAACAGGGGACAAAA-3'	5'-GCCTCCGCTGTTCTTCACCCAGTC-3'	305
	DUSP5	5'-CTCCCACTTTCAAGAAGCAA-3'	5'-GGCAGGATCTCAGATTCGTA-3'	240
	EDN1	5'-CCTGGACATCATTTGGGTCAACAC-3'	5'-GCACATTGGCATCTATTCTCACGG-3'	132
	EGR1	5'-CGCAAGAGGCATACCAAGAT-3'	5'-GGGAAAGCAGGGGGAACAGA-3'	290
	EGR2	5'-ATGACTGGAGAGAAGAGGTCGTTG-3'	5'-GGTACTGAGGGTCAATGGAGAACT-3'	118
	EGR3	5'-CACTCACATCCGCACTCATA-3'	5'-TTCTCCTTTTGCTTGAGGTG-3'	120
	FFAR2	5'-AGGTCAGAAGTGGCAATGAA-3'	5'-AAGCACACCAGGAAATTGAG-3'	241
	GAPDH	5'-CGAGATCCCTCCAAAATCAA-3'	5'-TTCACACCCATGACGAACAT-3'	170
	GBP1	5'-ACAGGGTCCAGTTGCTGAAA-3'	5'-TGGTACATGCCTTTCGTCGT-3'	159
	GPR84	5'-CAGGTCAAACGAGCAGCACA AS-3'	5'-CAAAGCAGAGGAACACAGCA-3'	376
	HRH4	5'-AGCCAGGAGATTAGCCAAGT-3'	5'-CCGACTGTGTTGTGATGGTA-3'	268
	HSPE1	5'-TGCTGCTGAAACTGTAACCA-3'	5'-CCACCCTTTCCTTTAGAACC-3'	111
	ICAM1	5'-GACTGGACGAGAGGGATTGT-3'	5'-ATTATGACTGCGGCTGCTAC-3'	289
	IER2	5'-CCAAAGTCAGCCGCAAACGA-3'	5'-TTTCTTCCAGACGGGCTTTCTTGC-3'	90
	IER3	5'-CAGATCCTGATGGCTGAAGA-3'	5'-CTGAGGTCCAGAGCGTAGTC-3'	149
	IER5	5'-CCGCCCGCCGCTCGTGCCTCTTGG-3'	5'-GTCCGCCTCTCCGCCCTGAAAAAC-3'	144
	IFNAR2	5'-CACAGTGATGAGCAAGCAGT-3'	5'-GACTTTGGGGAGGCTATTTC-3'	198
	IL-1a	5'-CCCAAAACCATCACAGGTAG-3'	5'-GCACACCCAGTAGTCTTGCT-3'	129
	IL-1b	5'-GGACAAGCTGAGGAAGATGC-3'	5'-TCGTTATCCCATGTGTCGAA-3'	120
	IL-1 RL1	5'-CTGGACAGCACCTCTTGAGT-3'	5'-GTGTAATCACCTGCGTCCTC-3'	120
	IL-1 RN	5'-GAAGATGTGCCTGTCCTGTG-3'	5'-ACTCAAAACTGGTGGTGGGG-3'	149
	IL-2 RB	5'-GGATGACCTGCTGCTCTTCT-3'	5'-CTCTGGGGACTCTTTCTTGC-3'	125
	IL-8/CXCL8	5'-GTGCAGTTTTGCCAAGGAGT-3'	5'-CTCTGCACCCAGTTTTCCTT-3'	196
	JUNB	5'-AACAGCCCTTCTACCACGAC-3'	5'-GCTCGGTTTCAGGAGTTTGT-3'	98
	KLF2	5'-GGCAAGACCTACACCAAGAG-3'	5'-CACAGATGGCACTGGAATG-3'	173
	LSP1	5'-TGAGCCCTACCACCAAACTCAT-3'	5'-TGGGTGTATTGTTCCAGCCACT-3'	133
	MAP3K1	5'-TCTACAGCCACGAGTTGTCA-3'	5'-AACGAGTTCCATTCCAAACA-3'	209
	MIP-1a /CCL3	5'-CTCTGCAACCAGGTCCTCTC-3'	5'-TTTCTGGACCCACTCCTCAC-3'	204
	MIP-2/CXCL2/CXCL3	5'-TGCAGGGAATTCACCTCAAG-3'	5'-TGAGACAAGCTTTCTGCCCA-3'	114
	MIP-3/CCL23	5'-GCATCTCCTACACCCCACGA-3'	5'-CTTCAGCATTCTCACGCAAA-3'	167
	MIP-3a /CCL20	5'-GCAAGCAACTTTGACTGCTG-3'	5'-ATTTGCGCACACAGACAACT-3'	150
	MT1E	5'-ATGGACCCCAACTGCTCTTGCG-3'	5'-CACTTCTCCGATGCCCCTTTGC-3'	170
	NFKBIA	5'-CAAAATCCTGACCTGGTGTC-3'	5'-TCCTCATCCTCACTCTCTGG-3'	179
	NFKBIZ	5'-GACACCACCTCAAACACCAA-3'	5'-AGAAAAGACCTGCCCTCCAT-3'	229
	NR4A3	5'-ACATACAGCTCGGAATACACCACG-3'	5'-TTTGGTACACGCAGGAAGGCTTGA-3	175
	OSM	5'-CTTTCCTGGAGGGTCTGGTC-3'	5'-GATTTGGAGAGGTCTGGGCT-3'	358
	PIAS2	5'-GGTTTTCAGTTTGGATGGTG-3'	5'-GTGTAACTGAAGTGGAAGGCAACG-3'	70
	PTPN12	5'-GATACCATCCAAAGCCAGTG-3'	5'-ATTGCATGTCCCCTATTCAA-3'	229
	RAB14	5'-GCTGGTTGACAGATGCAAGGAATC-3'	5'-GGAACAATAAGCCATTTTCTTCAG-3'	141
	RAB5C	5'-GGCAGTTCCATGAGTACCAG-3'	5'-GTAAACCACGATTGCAGCTT-3'	173
	RHOB	5'-TGTGCTTCTCGGTGGACAGC-3'	5'-CCTTCCTTGGTCTTGGCAGA-3'	253
	RHOH	5'-CGTGGTGCTGATGTGCTACT-3'	5'-CCTCCTTCTGTTTCGTCTCC-3'	313
	SOAT1	5'-GCTATCCCAGGAATCCCACT-3'	5'-CATAGGACCAGAACACGAGC-3'	163
	SOCS 2	5'-AAGAGGCACCAGAAGGAACT-3'	5'-CGATCAGATGAACCACACTG-3'	192
	SOCS 3	5'-CCCCCAGAAGAGCCTATTAC-3'	5'-TCGTACTGGTCCAGGAACTC-3'	187
	STAT6	5'-ACAGATGGGTAAGGATGGCAGGGG-3'	5'-GATGGAGTGAGAGTGTGGTGGGTA-3'	205
	TCEB1	5'-TGAAGGACCTGATGCCATGT-3'	5'-TGGAGCTGTTAGTGTAGCGA-3'	229
	TNF-a	5'-AGCCCATGTTGTAGCAAACC-3'	5'-TGAGGTACAGGCCCTCTGAT-3'	134
	TNFAIP3	5'-ACGCTCAAGGAAACAGACAC-3'	5'-TCATCATTCCAGTTCCGAGT-3'	116
	TNFAIP6	5'-TGTGGATTTGGAAAAACTGG-3'	5'-CTTTGCGTGTGGGTTGTAGC-3'	93
	TNFSF14	5'-CTACATCTACTCCAAGGTGC-3'	5'-GTGACTGCTGGCTGACCAAC-3'	134
	ZFP36	5'-ATCCGACCCTGATGAATATG-3'	5'-AGAGATGCGATTGAAGATGG-3'	136

## Sheet: Tableau suppl. liste genes
	SUPPLEMENTARY TABLE A. DIFFERENTIALLY-EXPRESSED GENES IN STIMULATED HUMAN NEUTROPHILS (GENECHIP RESULTS)
	Affimetrix Probe number	Official Symbol	Gene name	Accession number (NCBI)	Expression
	210118_s_at	IL1A	interleukin 1, alpha	NM_000575	UP
	205476_at	CCL20	chemokine (C-C motif) ligand 20; MIP-3 alpha	NM_004591	UP
	201693_s_at	EGR1	early growth response 1	NM_001964	UP
	206359_at	SOCS3	suppressor of cytokine signaling 3	NM_003955	UP
	1552711_a_at	CYB5D1	cytochrome b5 domain containing 1	NM_144607	UP
	209774_x_at	CXCL2	chemokine (C-X-C motif) ligand 2; MIP-2 alpha	NM_002089	UP
	226833_at	CYB5D1	cytochrome b5 domain containing 1	NM_144607	UP
	227697_at	SOCS3	suppressor of cytokine signaling 3	NM_003955	UP
	230170_at	OSM	oncostatin M	NM_020530	UP
	201235_s_at	BTG2	BTG family, member 2	NM_006763	UP
	210004_at	OLR1	oxidised low density lipoprotein (lectin-like) receptor 1	NM_002543	UP
	201694_s_at	EGR1	early growth response 1	NM_001964	UP
	207850_at	CXCL3	chemokine (C-X-C motif) ligand 3; MIP-2 beta	NM_002090	UP
	216243_s_at	IL1RN	interleukin 1 receptor antagonist	NM_000577///NM_173841///NM_173842///NM_173843	UP
	204794_at	DUSP2	dual specificity phosphatase 2	NM_004418	UP
	206360_s_at	SOCS3	suppressor of cytokine signaling 3	NM_003955	UP
	201904_s_at	CTDSPL	CTD (carboxy-terminal domain, RNA polymerase II, polypeptide A) small phosphatase-like	NM_001008392///NM_005808	UP
	202014_at	PPP1R15A	protein phosphatase 1, regulatory (inhibitor) subunit 15A	NM_014330	UP
	212659_s_at	IL1RN	interleukin 1 receptor antagonist	NM_000577///NM_173841///NM_173842///NM_173843	UP
	203821_at	HBEGF	heparin-binding EGF-like growth factor	NM_001945	UP
	223767_at	GPR84	G protein-coupled receptor 84	NM_020370	UP
	37028_at	PPP1R15A	protein phosphatase 1, regulatory (inhibitor) subunit 15A	NM_014330	UP
	207113_s_at	TNF	tumor necrosis factor (TNF superfamily, member 2)	NM_000594	UP
	202638_s_at	ICAM1	intercellular adhesion molecule 1 (CD54), human rhinovirus receptor	NM_000201	UP
	223377_x_at	CISH	cytokine inducible SH2-containing protein	NM_145071	UP
	205249_at	EGR2	early growth response 2 (Krox-20 homolog, Drosophila)	NM_000399	UP
	1557312_at	C12orf61	chromosome 12 open reading frame 61	NM_175895	UP
	223961_s_at	CISH	cytokine inducible SH2-containing protein	NM_145071	UP
	1554997_a_at	PTGS2	prostaglandin-endoperoxide synthase 2 (prostaglandin G/H synthase-2; COX-2)	NM_000963	UP
	38037_at	HBEGF	heparin-binding EGF-like growth factor	NM_001945	UP
	232045_at	PHACTR1	phosphatase and actin regulator 1	NM_030948	UP
	223217_s_at	NFKBIZ	nuclear factor of kappa light polypeptide gene enhancer in B-cells inhibitor, zeta	NM_001005474///NM_031419	UP
	202637_s_at	ICAM1	intercellular adhesion molecule 1 (CD54), human rhinovirus receptor	NM_000201	UP
	224948_at	MRPS24	mitochondrial ribosomal protein S24	NM_032014	UP
	201466_s_at	JUN	jun oncogene	NM_002228	UP
	39402_at	IL1B	interleukin 1, beta	NM_000576	UP
	222802_at	EDN1	endothelin 1	NM_001955	UP
	207999_s_at	ADARB1	adenosine deaminase, RNA-specific, B1 (RED1 homolog rat)	NM_001033049///NM_001112///NM_015833/// NM_015834	UP
	204440_at	CD83	CD83 molecule	NM_001040280///NM_004233	UP
	201473_at	JUNB	jun B proto-oncogene	NM_002229	UP
	221223_x_at	CISH	cytokine inducible SH2-containing protein	NM_145071	UP
	210001_s_at	SOCS1	suppressor of cytokine signaling 1	NM_003745	UP
	216920_s_at	TARP	TCR gamma alternate reading frame protein	NM_001003806///NM_001003799	UP
	205067_at	IL1B	interleukin 1, beta	NM_000576	UP
	230499_at	BIRC3	baculoviral IAP repeat-containing 3	NM_001165///NM_182962	UP
	201531_at	ZFP36	zinc finger protein 36, C3H type, homolog (mouse)	NM_003407	UP
	217996_at	PHLDA1	pleckstrin homology-like domain, family A, member 1	NM_007350	UP
	235324_at	SFRS3	splicing factor, arginine/serine-rich 3	NM_003017	UP
	201464_x_at	JUN	jun oncogene	NM_002228	UP
	211538_s_at	HSPA2	heat shock 70kDa protein 2	NM_021979	UP
	215806_x_at	TARP	TCR gamma alternate reading frame protein	NM_001003806///NM_001003799	UP
	210538_s_at	BIRC3	baculoviral IAP repeat-containing 3	NM_001165///NM_182962	UP
	202768_at	FOSB	FBJ murine osteosarcoma viral oncogene homolog B	NM_006732	UP
	224716_at	SLC35B2	solute carrier family 35, member B2	NM_178148	UP
	205000_at	DDX3Y	DEAD (Asp-Glu-Ala-Asp) box polypeptide 3, Y-linked	NM_004660	UP
	215485_s_at	ICAM1	intercellular adhesion molecule 1 (CD54), human rhinovirus receptor	NM_000201	UP
	223262_s_at	FGFR1OP2	FGFR1 oncogene partner 2	NM_015633	UP
	204951_at	RHOH	ras homolog gene family, member H	NM_004310	UP
	203394_s_at	HES1	hairy and enhancer of split 1, (Drosophila)	NM_005524	UP
	202672_s_at	ATF3	activating transcription factor 3	NM_001030287///NM_001040619///NM_001674/// NM_004024	UP
	241748_x_at	TSSK2	testis-specific serine kinase 2	NM_053006	UP
	206115_at	EGR3	early growth response 3	NM_004430	UP
	229054_at	FLJ39779	FLJ39779 protein	NM_207442	UP
	208687_x_at	HSPA8	heat shock 70kDa protein 8	NM_006597///NM_153201	UP
	208673_s_at	SFRS3	splicing factor, arginine/serine-rich 3	NM_003017	UP
	209457_at	DUSP5	dual specificity phosphatase 5	NM_004419	UP
	220562_at	CYP2W1	cytochrome P450, family 2, subfamily W, polypeptide 1	NM_017781	UP
	201703_s_at	PPP1R10	protein phosphatase 1, regulatory subunit 10	NM_002714	UP
	210280_at	MPZ	myelin protein zero (Charcot-Marie-Tooth neuropathy 1B)	NM_000530	UP
	206157_at	PTX3	pentraxin-related gene, rapidly induced by IL-1 beta	NM_002852	UP
	202643_s_at	TNFAIP3	tumor necrosis factor, alpha-induced protein 3	NM_006290	UP
	212657_s_at	IL1RN	interleukin 1 receptor antagonist	NM_000577///NM_173841///NM_173842///NM_173843	UP
	213606_s_at	ARHGDIA	Rho GDP dissociation inhibitor (GDI) alpha	NM_004309	UP
	209813_x_at	TARP	TCR gamma alternate reading frame protein	NM_001003806///NM_001003799	UP
	211144_x_at	TARP	TCR gamma alternate reading frame protein	NM_001003806///NM_001003799	UP
	209304_x_at	GADD45B	growth arrest and DNA-damage-inducible, beta	NM_015675	UP
	1565254_s_at	ELL	elongation factor RNA polymerase II	NM_006532	UP
	204233_s_at	CHKA	choline kinase alpha	NM_001277///NM_212469	UP
	201631_s_at	IER3	immediate early response 3	NM_003897	UP
	224187_x_at	HSPA8	heat shock 70kDa protein 8	NM_006597///NM_153201	UP
	214446_at	ELL2	elongation factor, RNA polymerase II, 2	NM_012081	UP
	201939_at	PLK2	polo-like kinase 2 (Drosophila)	NM_006622	UP
	205767_at	EREG	epiregulin	NM_001432	UP
	33323_r_at	SFN	stratifin	NM_006142	UP
	208672_s_at	SFRS3	splicing factor, arginine/serine-rich 3	NM_003017	UP
	223218_s_at	NFKBIZ	nuclear factor of kappa light polypeptide gene enhancer in B-cells inhibitor, zeta	NM_001005474///NM_031419	UP
	231951_at	GNAO1	guanine nucleotide binding protein (G protein), alpha activating activity polypeptide O	NM_020988///NM_138736	UP
	227335_at	DIDO1	death inducer-obliterator 1	NM_022105///NM_033081///NM_080796///NM_080797	UP
	224692_at	PPP1R15B	protein phosphatase 1, regulatory (inhibitor) subunit 15B	NM_032833	UP
	220046_s_at	CCNL1	cyclin L1	NM_020307	UP
	200664_s_at	DNAJB1	DnaJ (Hsp40) homolog, subfamily B, member 1	NM_006145	UP
	201996_s_at	SPEN	spen homolog, transcriptional regulator (Drosophila)	NM_015001	UP
	210511_s_at	INHBA	inhibin, beta A (activin A, activin AB alpha polypeptide)	NM_002192	UP
	217650_x_at	ST3GAL2	ST3 beta-galactoside alpha-2,3-sialyltransferase 2	NM_006927	UP
	227475_at	FOXQ1	forkhead box Q1	NM_033260	UP
	207093_s_at	OMG	oligodendrocyte myelin glycoprotein	NM_002544	UP
	209305_s_at	GADD45B	growth arrest and DNA-damage-inducible, beta	NM_015675	UP
	212810_s_at	SLC1A4	solute carrier family 1 (glutamate/neutral amino acid transporter), member 4	NM_003038	UP
	202081_at	IER2	immediate early response 2	NM_004907	UP
	221345_at	FFAR2	free fatty acid receptor 2	NM_005306	UP
	209795_at	CD69	CD69 molecule	NM_001781	UP
	1555411_a_at	CCNL1	cyclin L1	NM_020307	UP
	201702_s_at	PPP1R10	protein phosphatase 1, regulatory subunit 10	NM_002714	UP
	228937_at	C13orf31	chromosome 13 open reading frame 31	NM_153218	UP
	214911_s_at	BRD2	bromodomain containing 2	NM_005104	UP
	203542_s_at	KLF9	Kruppel-like factor 9	NM_001206	UP
	205193_at	MAFF	v-maf musculoaponeurotic fibrosarcoma oncogene homolog F (avian)	NM_012323///NM_152878	UP
	207980_s_at	CITED2	Cbp/p300-interacting transactivator, with Glu/Asp-rich carboxy-terminal domain, 2	NM_006079	UP
	201044_x_at	DUSP1	dual specificity phosphatase 1	NM_004417	UP
	1555214_a_at	CLEC7A	C-type lectin domain family 7, member A	NM_197954///NM_022570///NM_197947///NM_197948///NM_197949///NM_197950	UP
	216915_s_at	PTPN12	protein tyrosine phosphatase, non-receptor type 12	NM_002835	UP
	201140_s_at	RAB5C	RAB5C, member RAS oncogene family	NM_004583///NM_201434	UP
	1553153_at	ATP6V0D2	ATPase, H+ transporting, lysosomal 38kDa, V0 subunit d2	NM_152565	UP
	213082_s_at	SLC35D2	solute carrier family 35, member D2	NM_007001	UP
	201490_s_at	PPIF	peptidylprolyl isomerase F (cyclophilin F)	NM_005729	UP
	202269_x_at	GBP1	guanylate binding protein 1, interferon-inducible, 67kDa	NM_002053	UP
	214119_s_at	FKBP1A	FK506 binding protein 1A, 12kDa	NM_000801///NM_054014	UP
	201489_at	PPIF	peptidylprolyl isomerase F (cyclophilin F)	NM_005729	UP
	223394_at	SERTAD1	SERTA domain containing 1	NM_013376	UP
	212839_s_at	TROVE2	TROVE domain family, member 2	NM_001042369///NM_001042370///NM_004600	UP
	213407_at	PHLPPL	PH domain and leucine rich repeat protein phosphatase-like	NM_015020	UP
	219557_s_at	NRIP3	nuclear receptor interacting protein 3	NM_020645	UP
	219371_s_at	KLF2	Kruppel-like factor 2 (lung)	NM_016270	UP
	205133_s_at	HSPE1	heat shock 10kDa protein 1 (chaperonin 10)	NM_002157	UP
	206675_s_at	SKIL	SKI-like	NM_005414	UP
	201296_s_at	WSB1	WD repeat and SOCS box-containing 1	NM_015626///NM_134265	UP
	221891_x_at	HSPA8	heat shock 70kDa protein 8	NM_006597///NM_153201	UP
	1553399_a_at	C17orf69	chromosome 17 open reading frame 69	NM_152466	UP
	239648_at	DCUN1D3	DCN1, defective in cullin neddylation 1, domain containing 3 (S. cerevisiae)	NM_173475	UP
	231577_s_at	GBP1	guanylate binding protein 1, interferon-inducible, 67kDa	NM_002053	UP
	235971_at	TIFA	TRAF-interacting protein with a forkhead-associated domain	NM_052864	UP
	221169_s_at	HRH4	histamine receptor H4	NM_021624	UP
	212099_at	RHOB	ras homolog gene family, member B	NM_004040	UP
	214706_at	ZNF200	zinc finger protein 200	NM_003454///NM_198087///NM_198088	UP
	206911_at	TRIM25	tripartite motif-containing 25	NM_005082	UP
	206170_at	ADRB2	adrenergic, beta-2-, receptor, surface	NM_000024	UP
	212859_x_at	MT1E	metallothionein 1E (functional)	NM_175617	UP
	208685_x_at	BRD2	bromodomain containing 2	NM_005104	UP
	235177_at	FAM119A	family with sequence similarity 119, member A	NM_145280	UP
	222679_s_at	DCUN1D1	DCN1, defective in cullin neddylation 1, domain containing 1 (S. cerevisiae)	NM_020640	UP
	218611_at	IER5	immediate early response 5	NM_016545	UP
	226646_at	KLF2	Kruppel-like factor 2 (lung)	NM_016270	UP
	200666_s_at	DNAJB1	DnaJ (Hsp40) homolog, subfamily B, member 1	NM_006145	UP
	220235_s_at	C1orf103	chromosome 1 open reading frame 103	NM_001006945///NM_018372	UP
	218030_at	GIT1	G protein-coupled receptor kinase interactor 1	NM_014030	UP
	202340_x_at	NR4A1	nuclear receptor subfamily 4, group A, member 1	NM_002135///NM_173157///NM_173158	UP
	211506_s_at	IL8	interleukin 8	NM_000584	UP
	225856_at	CLOCK	clock homolog (mouse)	NM_004898	UP
	209189_at	FOS	v-fos FBJ murine osteosarcoma viral oncogene homolog	NM_005252	UP
	201329_s_at	ETS2	v-ets erythroblastosis virus E26 oncogene homolog 2 (avian)	NM_005239	UP
	207574_s_at	GADD45B	growth arrest and DNA-damage-inducible, beta	NM_015675	UP
	207105_s_at	PIK3R2	phosphoinositide-3-kinase, regulatory subunit 2 (p85 beta)	NM_005027	UP
	203373_at	SOCS2	suppressor of cytokine signaling 2	NM_003877	UP
	228069_at	FAM54A	family with sequence similarity 54, member A	NM_138419	UP
	202899_s_at	SFRS3	splicing factor, arginine/serine-rich 3	NM_003017	UP
	1554080_at	RQCD1	RCD1 required for cell differentiation1 homolog (S. pombe)	NM_005444	UP
	232072_at	ASAHL	N-acylsphingosine amidohydrolase (acid ceramidase)-like	NM_001042402///NM_014435	UP
	222670_s_at	MAFB	v-maf musculoaponeurotic fibrosarcoma oncogene homolog B (avian)	NM_005461	UP
	224928_at	SETD7	SET domain containing (lysine methyltransferase) 7	NM_030648	UP
	207526_s_at	IL1RL1	interleukin 1 receptor-like 1	NM_003856///NM_016232	UP
	225954_s_at	MIDN	midnolin	NM_177401	UP
	209326_at	SLC35A2	solute carrier family 35 (UDP-galactose transporter), member A2	NM_001032289///NM_001042498///NM_005660	UP
	201236_s_at	BTG2	BTG family, member 2	NM_006763	UP
	224836_at	TP53INP2	tumor protein p53 inducible nuclear protein 2	NM_021202	UP
	201167_x_at	ARHGDIA	Rho GDP dissociation inhibitor (GDI) alpha	NM_004309	UP
	201108_s_at	THBS1	thrombospondin 1	NM_003246	UP
	205001_s_at	DDX3Y	DEAD (Asp-Glu-Ala-Asp) box polypeptide 3, Y-linked	NM_004660	UP
	210561_s_at	WSB1	WD repeat and SOCS box-containing 1	NM_015626///NM_134265	UP
	219558_at	ATP13A3	ATPase type 13A3	NM_024524	UP
	204970_s_at	MAFG	v-maf musculoaponeurotic fibrosarcoma oncogene homolog G (avian)	NM_002359///NM_032711	UP
	1554690_a_at	TACC1	transforming, acidic coiled-coil containing protein 1	NM_006283	UP
	200881_s_at	DNAJA1	DnaJ (Hsp40) homolog, subfamily A, member 1	NM_001539	UP
	223939_at	SUCNR1	succinate receptor 1	NM_033050	UP
	217289_s_at	SLC37A4	solute carrier family 37 (glycerol-6-phosphate transporter), member 4	NM_001467	UP
	206765_at	KCNJ2	potassium inwardly-rectifying channel, subfamily J, member 2	NM_000891	UP
	202401_s_at	SRF	serum response factor (c-fos serum response element-binding transcription factor)	NM_003131	UP
	33322_i_at	SFN	stratifin	NM_006142	UP
	230267_at	WSB1	WD repeat and SOCS box-containing 1	NM_015626///NM_134265	UP
	244434_at	GPR82	G protein-coupled receptor 82	NM_080817	UP
	210549_s_at	CCL23	chemokine (C-C motif) ligand 23; MIP-3	NM_005064///NM_145898	UP
	201920_at	SLC20A1	solute carrier family 20 (phosphate transporter), member 1	NM_005415	UP
	201586_s_at	SFPQ	splicing factor proline/glutamine-rich (polypyrimidine tract binding protein associated)	NM_005066	UP
	1557455_s_at	MOSPD1	motile sperm domain containing 1	NM_019556	UP
	204748_at	PTGS2	prostaglandin-endoperoxide synthase 2 (prostaglandin G/H synthase-2; COX-2)	NM_000963	UP
	204270_at	SKI	v-ski sarcoma viral oncogene homolog (avian)	NM_003036	UP
	222645_s_at	KCTD5	potassium channel tetramerisation domain containing 5	NM_018992	UP
	226345_at	ARL5B	ADP-ribosylation factor-like 5B	NM_178815	UP
	202644_s_at	TNFAIP3	tumor necrosis factor, alpha-induced protein 3	NM_006290	UP
	205114_s_at	CCL3	chemokine (C-C motif) ligand 3; MIP-1 alpha	NM_002983	UP
	209959_at	NR4A3	nuclear receptor subfamily 4, group A, member 3	NM_006981///NM_173198///NM_173199///NM_173200	UP
	209383_at	DDIT3	DNA-damage-inducible transcript 3	NM_004083	UP
	205291_at	IL2RB	interleukin 2 receptor, beta	NM_000878	UP
	202284_s_at	CDKN1A	cyclin-dependent kinase inhibitor 1A (p21, Cip1)	NM_000389///NM_078467	UP
	202912_at	ADM	adrenomedullin	NM_001124	UP
	208806_at	CHD3	chromodomain helicase DNA binding protein 3	NM_001005271///NM_001005273///NM_005852	UP
	206034_at	SERPINB8	serpin peptidase inhibitor, clade B (ovalbumin), member 8	NM_001031848///NM_002640///NM_198833	UP
	224739_at	PIM3	pim-3 oncogene	NM_001001852	UP
	223281_s_at	COX15	COX15 homolog, cytochrome c oxidase assembly protein (yeast)	NM_004376///NM_078470	UP
	207764_s_at	HIPK3	homeodomain interacting protein kinase 3	NM_001048200///NM_005734	UP
	214007_s_at	PTK9	PTK9 protein tyrosine kinase 9	NM_002822///NM_198974	UP
	235604_x_at	ZNF493	zinc finger protein 493	NM_001076678///NM_175910	UP
	218619_s_at	SUV39H1	suppressor of variegation 3-9 homolog 1 (Drosophila)	NM_003173	UP
	202616_s_at	MECP2	methyl CpG binding protein 2 (Rett syndrome)	NM_004992	UP
	36711_at	MAFF	v-maf musculoaponeurotic fibrosarcoma oncogene homolog F (avian)	NM_012323///NM_152878	UP
	203470_s_at	PLEK	pleckstrin	NM_002664	UP
	221010_s_at	SIRT5	sirtuin (silent mating type information regulation 2 homolog) 5 (S. cerevisiae)	NM_012241///NM_031244	UP
	209301_at	CA2	carbonic anhydrase II	NM_000067	UP
	231933_at	2007-03-08	membrane-associated ring finger (C3HC4) 8	NM_001002265///NM_001002266///NM_145021	UP
	239704_at	IBRDC2	IBR domain containing 2	NM_182757	UP
	217165_x_at	MT1F	metallothionein 1F (functional)	NM_005949	UP
	1564974_at	KRTAP8-1	keratin associated protein 8-1	NM_175857	UP
	204614_at	SERPINB2	serpin peptidase inhibitor, clade B (ovalbumin), member 2	NM_002575	UP
	204011_at	SPRY2	sprouty homolog 2 (Drosophila)	NM_005842	UP
	206976_s_at	HSPH1	heat shock 105kDa/110kDa protein 1	NM_006644	UP
	211302_s_at	PDE4B	phosphodiesterase 4B, cAMP-specific (phosphodiesterase E4 dunce homolog, Drosophila)	NM_001037339///NM_001037340///NM_001037341///NM_002600	UP
	210186_s_at	FKBP1A	FK506 binding protein 1A, 12kDa	NM_000801///NM_054014	UP
	209357_at	CITED2	Cbp/p300-interacting transactivator, with Glu/Asp-rich carboxy-terminal domain, 2	NM_006079	UP
	223076_s_at	NSUN2	NOL1/NOP2/Sun domain family, member 2	NM_017755	UP
	201110_s_at	THBS1	thrombospondin 1	NM_003246	UP
	232075_at	WDR61	WD repeat domain 61	NM_025234	UP
	207971_s_at	CEP68	centrosomal protein 68kDa	NM_015147	UP
	200670_at	XBP1	X-box binding protein 1	NM_005080	UP
	210826_x_at	RAD17	RAD17 homolog (S. pombe)	NM_002873///NM_133338///NM_133339///NM_133340///NM_133341///NM_133342///NM_133343/// NM_133344	UP
	203707_at	ZNF263	zinc finger protein 263	NM_005741	UP
	203643_at	ERF	Ets2 repressor factor	NM_006494	UP
	221260_s_at	C12orf22	chromosome 12 open reading frame 22	NM_030809	UP
	212462_at	MYST4	MYST histone acetyltransferase (monocytic leukemia) 4	NM_012330	UP
	218384_at	CARHSP1	calcium regulated heat stable protein 1, 24kDa	NM_001042476///NM_014316	UP
	203833_s_at	TGOLN2	trans-golgi network protein 2	NM_006464	UP
	206025_s_at	TNFAIP6	tumor necrosis factor, alpha-induced protein 6	NM_007115	UP
	202650_s_at	KIAA0195	KIAA0195	NM_014738	UP
	218883_s_at	MLF1IP	MLF1 interacting protein	NM_024629	UP
	222606_at	ZWILCH	Zwilch, kinetochore associated, homolog (Drosophila)	NM_017975	UP
	205246_at	PEX13	peroxisome biogenesis factor 13	NM_002618	UP
	243611_at	MICALCL	MICAL C-terminal like	NM_032867	UP
	221985_at	KLHL24	kelch-like 24 (Drosophila)	NM_017644	UP
	200880_at	DNAJA1	DnaJ (Hsp40) homolog, subfamily A, member 1	NM_001539	UP
	201502_s_at	NFKBIA	nuclear factor of kappa light polypeptide gene enhancer in B-cells inhibitor, alpha	NM_020529	UP
	244519_at	ASXL1	additional sex combs like 1 (Drosophila)	NM_015338	UP
	225945_at	ZNF655	zinc finger protein 655	NM_001009956///NM_001009957///NM_001009958/// NM_001009960///NM_024061///NM_138494	UP
	214197_s_at	SETDB1	SET domain, bifurcated 1	NM_012432	UP
	1555487_a_at	ACTR3B	ARP3 actin-related protein 3 homolog B (yeast)	NM_001040135///NM_020445	UP
	242062_at	SAMD8	sterile alpha motif domain containing 8	NM_144660	UP
	224346_at	GYS1	glycogen synthase 1 (muscle)	NM_002103	UP
	212817_at	DNAJB5	DnaJ (Hsp40) homolog, subfamily B, member 5	NM_012266	UP
	223380_s_at	LATS2	LATS, large tumor suppressor, homolog 2 (Drosophila)	NM_014572	UP
	211706_s_at	CDC2L6	cell division cycle 2-like 6 (CDK8-like)	NM_015076	UP
	238858_at	TIFA	TRAF-interacting protein with a forkhead-associated domain	NM_052864	UP
	202773_s_at	SFRS8	splicing factor, arginine/serine-rich 8 (suppressor-of-white-apricot homolog, Drosophila)	NM_004592	UP
	1553990_at	C16orf79	chromosome 16 open reading frame 79	NM_182563	DOWN
	227864_s_at	FAM125A	family with sequence similarity 125, member A	NM_138401	DOWN
	204786_s_at	IFNAR2	interferon (alpha, beta and omega) receptor 2	NM_000874///NM_207584///NM_207585	DOWN
	219266_at	ZNF350	zinc finger protein 350	NM_021632	DOWN
	220368_s_at	SMEK1	SMEK homolog 1, suppressor of mek1 (Dictyostelium)	NM_032560	DOWN
	230480_at	PIWIL4	piwi-like 4 (Drosophila)	NM_152431	DOWN
	213446_s_at	IQGAP1	IQ motif containing GTPase activating protein 1	NM_003870	DOWN
	212908_at	DNAJC16	DnaJ (Hsp40) homolog, subfamily C, member 16	NM_015291	DOWN
	204963_at	SSPN	sarcospan (Kras oncogene-associated gene)	NM_005086	DOWN
	222687_s_at	PHCA	phytoceramidase, alkaline	NM_018367	DOWN
	221561_at	SOAT1	sterol O-acyltransferase (acyl-Coenzyme A: cholesterol acyltransferase) 1	NM_003101	DOWN
	213694_at	RSBN1	round spermatid basic protein 1	NM_018364	DOWN
	1552651_a_at	RFFL	ring finger and FYVE-like domain containing 1	NM_001017368///NM_057178	DOWN
	209143_s_at	CLNS1A	chloride channel, nucleotide-sensitive, 1A	NM_001293	DOWN
	228480_at	VAPA	VAMP (vesicle-associated membrane protein)-associated protein A, 33kDa	NM_003574///NM_194434	DOWN
	243868_at	RFX3	regulatory factor X, 3 (influences HLA class II expression)	NM_002919///NM_134428	DOWN
	1567458_s_at	RAC1	ras-related C3 botulinum toxin substrate 1 (rho family, small GTP binding protein Rac1)	NM_006908///NM_018890///NM_198829	DOWN
	209317_at	POLR1C	polymerase (RNA) I polypeptide C, 30kDa	NM_004875///NM_203290	DOWN
	1553311_at	C20orf197	chromosome 20 open reading frame 197	NM_173644	DOWN
	223190_s_at	MLL5	myeloid/lymphoid or mixed-lineage leukemia 5 (trithorax homolog, Drosophila)	NM_018682///NM_182931	DOWN
	238013_at	PLEKHA2	pleckstrin homology domain containing, family A (phosphoinositide binding specific) member 2	XM_496973	DOWN
	220637_at	FAM124B	family with sequence similarity 124B	NM_024785	DOWN
	201082_s_at	DCTN1	dynactin 1 (p150, glued homolog, Drosophila)	NM_004082///NM_023019	DOWN
	203921_at	CHST2	carbohydrate (N-acetylglucosamine-6-O) sulfotransferase 2	NM_004267	DOWN
	214965_at	C16orf76	chromosome 16 open reading frame 76	NM_152339	DOWN
	201332_s_at	STAT6	signal transducer and activator of transcription 6, interleukin-4 induced	NM_003153	DOWN
	202823_at	TCEB1	transcription elongation factor B (SIII), polypeptide 1 (15kDa, elongin C)	NM_005648	DOWN
	218507_at	HIG2	hypoxia-inducible protein 2	NM_013332	DOWN
	212027_at	RBM25	RNA binding motif protein 25	NM_021239	DOWN
	218228_s_at	TNKS2	tankyrase, TRF1-interacting ankyrin-related ADP-ribose polymerase 2	NM_025235	DOWN
	225489_at	TMEM18	transmembrane protein 18	NM_152834	DOWN
	210985_s_at	SP100	SP100 nuclear antigen	NM_003113	DOWN
	209233_at	EMG1	EMG1 nucleolar protein homolog (S. cerevisiae)	NM_006331	DOWN
	201763_s_at	DAXX	death-associated protein 6	NM_001350	DOWN
	221958_s_at	GPR177	G protein-coupled receptor 177	NM_001002292///NM_024911	DOWN
	231732_at	SMPD3	sphingomyelin phosphodiesterase 3, neutral membrane (neutral sphingomyelinase II)	NM_018667	DOWN
	221647_s_at	RIC8A	resistance to inhibitors of cholinesterase 8 homolog A (C. elegans)	NM_021932	DOWN
	225111_s_at	NAPB	N-ethylmaleimide-sensitive factor attachment protein, beta	NM_022080	DOWN
	231111_at	SCYL3	SCY1-like 3 (S. cerevisiae)	NM_020423///NM_181093	DOWN
	201641_at	BST2	bone marrow stromal cell antigen 2	NM_004335	DOWN
	224626_at	SLC35A4	solute carrier family 35, member A4	NM_080670	DOWN
	217448_s_at	KIAA0737	KIAA0737	NM_014828	DOWN
	239637_at	RAB18	RAB18, member RAS oncogene family	NM_021252	DOWN
	205875_s_at	TREX1	three prime repair exonuclease 1	NM_016381///NM_032166///NM_033627///NM_033628///NM_033629///NM_130384	DOWN
	200928_s_at	RAB14	RAB14, member RAS oncogene family	NM_016322	DOWN
	222923_s_at	KCNE3	potassium voltage-gated channel, Isk-related family, member 3	NM_005472	DOWN
	232865_at	AFF4	AF4/FMR2 family, member 4	NM_014423	DOWN
	200665_s_at	SPARC	secreted protein, acidic, cysteine-rich (osteonectin)	NM_003118	DOWN
	1555514_a_at	PIAS2	protein inhibitor of activated STAT, 2	NM_004671///NM_173206	DOWN
	214786_at	MAP3K1	mitogen-activated protein kinase kinase kinase 1	XM_001128827///XM_042066	DOWN
	35820_at	GM2A	GM2 ganglioside activator	NM_000405	DOWN
	204857_at	MAD1L1	MAD1 mitotic arrest deficient-like 1 (yeast)	NM_001013836///NM_001013837///NM_003550	DOWN
	209565_at	RNF113A	ring finger protein 113A	NM_006978	DOWN
	231426_at	C9orf71	chromosome 9 open reading frame 71	NM_153237	DOWN
	226680_at	IKZF5	IKAROS family zinc finger 5 (Pegasus)	NM_022466	DOWN
	1554021_a_at	ZNF12	zinc finger protein 12	NM_006956///NM_016265	DOWN
	215220_s_at	TPR	translocated promoter region (to activated MET oncogene)	NM_003292	DOWN
	241443_at	ADI1	acireductone dioxygenase 1	NM_018269	DOWN
	218096_at	AGPAT5	1-acylglycerol-3-phosphate O-acyltransferase 5 (lysophosphatidic acid acyltransferase, epsilon)	NM_018361	DOWN
	207556_s_at	DGKZ	diacylglycerol kinase, zeta 104kDa	NM_003646///NM_201532///NM_201533	DOWN
	217730_at	TMBIM1	transmembrane BAX inhibitor motif containing 1	NM_022152	DOWN
	212085_at	SLC25A6	solute carrier family 25 (mitochondrial carrier; adenine nucleotide translocator), member 6	NM_001636	DOWN
	1557227_s_at	TPR	translocated promoter region (to activated MET oncogene)	NM_003292	DOWN
	230142_s_at	CIRBP	cold inducible RNA binding protein	NM_001280	DOWN
	204449_at	PDCL	phosducin-like	NM_005388	DOWN
	202535_at	FADD	Fas (TNFRSF6)-associated via death domain	NM_003824	DOWN
	1555355_a_at	ETS1	v-ets erythroblastosis virus E26 oncogene homolog 1 (avian)	NM_005238	DOWN
	203523_at	LSP1	lymphocyte-specific protein 1	NM_001013253///NM_001013254///NM_001013255/// NM_002339	DOWN
	214671_s_at	ABR	active BCR-related gene	NM_001092///NM_021962	DOWN
	1570347_at	COASY	Coenzyme A synthase	NM_001042529///NM_001042530///NM_001042531/// NM_001042532///NM_025233	DOWN
	235574_at	GBP4	guanylate binding protein 4	NM_052941	DOWN
	204647_at	HOMER3	homer homolog 3 (Drosophila)	NM_004838	DOWN
	204750_s_at	DSC2	desmocollin 2	NM_004949///NM_024422	DOWN
	208930_s_at	ILF3	interleukin enhancer binding factor 3, 90kDa	NM_004516///NM_012218///NM_153464	DOWN
	230270_at	PRPF38B	PRP38 pre-mRNA processing factor 38 (yeast) domain containing B	NM_018061	DOWN
	203791_at	DMXL1	Dmx-like 1	NM_005509	DOWN
	214093_s_at	FUBP1	far upstream element (FUSE) binding protein 1	NM_003902	DOWN
	206371_at	FOLR3	folate receptor 3 (gamma)	NM_000804	DOWN
	204642_at	EDG1	endothelial differentiation, sphingolipid G-protein-coupled receptor, 1	NM_001400	DOWN
	1552691_at	ARL11	ADP-ribosylation factor-like 11	NM_138450	DOWN
	238890_at	BRWD1	bromodomain and WD repeat domain containing 1	NM_001007246///NM_018963///NM_033656	DOWN
	212720_at	PAPOLA	poly(A) polymerase alpha	NM_032632	DOWN
	234465_at	EME1	essential meiotic endonuclease 1 homolog 1 (S. pombe)	NM_152463	DOWN
	237387_at	ARPC5	actin related protein 2/3 complex, subunit 5, 16kDa	NM_005717	DOWN
	228315_at	ZMAT3	zinc finger, matrin type 3	NM_022470///NM_152240	DOWN
	201793_x_at	SMG7	Smg-7 homolog, nonsense mediated mRNA decay factor (C. elegans)	NM_014837///NM_173156///NM_201568///NM_201569	DOWN
	222922_at	KCNE3	potassium voltage-gated channel, Isk-related family, member 3	NM_005472	DOWN
	231956_at	KIAA1618	KIAA1618	NM_020954	DOWN
	220369_at	SMEK1	SMEK homolog 1, suppressor of mek1 (Dictyostelium)	NM_032560	DOWN
	231234_at	CTSC	cathepsin C	NM_001814///NM_148170	DOWN
	210010_s_at	SLC25A1	solute carrier family 25 (mitochondrial carrier; citrate transporter), member 1	NM_005984	DOWN
	205640_at	ALDH3B1	aldehyde dehydrogenase 3 family, member B1	NM_000694///NM_001030010	DOWN
	228483_s_at	PGK1	phosphoglycerate kinase 1	NM_000291	DOWN
	229193_at	CROP	cisplatin resistance-associated overexpressed protein	NM_006107///NM_016424	DOWN
	1555225_at	C1orf43	chromosome 1 open reading frame 43	NM_015449///NM_138740	DOWN
	204090_at	STK19	serine/threonine kinase 19	NM_004197///NM_032454	DOWN
	217427_s_at	HIRA	HIR histone cell cycle regulation defective homolog A (S. cerevisiae)	NM_003325	DOWN
	210443_x_at	OGFR	opioid growth factor receptor	NM_007346	DOWN
	213574_s_at	KPNB1	karyopherin (importin) beta 1	NM_002265	DOWN
	219849_at	ZNF671	zinc finger protein 671	NM_024833	DOWN
	209734_at	NCKAP1L	NCK-associated protein 1-like	NM_005337	DOWN
	223261_at	POLK	polymerase (DNA directed) kappa	NM_016218	DOWN
	207907_at	TNFSF14	tumor necrosis factor (ligand) superfamily, member 14	NM_003807///NM_172014	DOWN
	225431_x_at	ACY1L2	aminoacylase 1-like 2	NM_001010853	DOWN
	225223_at	SMAD5	SMAD, mothers against DPP homolog 5 (Drosophila)	NM_001001419///NM_001001420///NM_005903	DOWN
	210943_s_at	LYST	lysosomal trafficking regulator	NM_000081///NM_001005736	DOWN
	1559050_at	HCG27	HLA complex group 27	NM_181717	DOWN
	233308_at	COPB1	coatomer protein complex, subunit beta 1	NM_016451	DOWN
	1558560_s_at	BLZF1	basic leucine zipper nuclear factor 1 (JEM-1)	NM_003666	DOWN
	229498_at	MBNL3	muscleblind-like 3 (Drosophila)	NM_018388///NM_133486	DOWN
	229060_at	YPEL2	yippee-like 2 (Drosophila)	NM_001005404	DOWN
	213178_s_at	MAPK8IP3	mitogen-activated protein kinase 8 interacting protein 3	NM_001040439///NM_015133	DOWN
	208874_x_at	PPP2R4	protein phosphatase 2A, regulatory subunit B' (PR 53)	NM_021131///NM_178000///NM_178001///NM_178003	DOWN
	203916_at	NDST2	N-deacetylase/N-sulfotransferase (heparan glucosaminyl) 2	NM_003635	DOWN
	1556551_s_at	SLC39A6	solute carrier family 39 (zinc transporter), member 6	NM_012319	DOWN
	212005_at	C1orf144	chromosome 1 open reading frame 144	NM_015609	DOWN
	201831_s_at	VDP	vesicle docking protein p115	NM_003715	DOWN
	208612_at	PDIA3	protein disulfide isomerase family A, member 3	NM_005313	DOWN
	210604_at	GNAT2	guanine nucleotide binding protein (G protein), alpha transducing activity polypeptide 2	NM_005272	DOWN
	218999_at	TMEM140	transmembrane protein 140	NM_018295	DOWN
	232722_at	RNASET2	ribonuclease T2	NM_003730	DOWN
	216682_s_at	FAM48A	family with sequence similarity 48, member A	NM_001014286///NM_017569	DOWN
	228071_at	GIMAP7	GTPase, IMAP family member 7	NM_153236	DOWN
	223684_s_at	SMUG1	single-strand-selective monofunctional uracil-DNA glycosylase 1	NM_014311	DOWN
	201120_s_at	PGRMC1	progesterone receptor membrane component 1	NM_006667	DOWN
	219565_at	CYP20A1	cytochrome P450, family 20, subfamily A, polypeptide 1	NM_020674///NM_177538	DOWN
	226610_at	PRR6	proline rich 6	NM_181716	DOWN
	213803_at	KPNB1	karyopherin (importin) beta 1	NM_002265	DOWN
	226479_at	KBTBD6	kelch repeat and BTB (POZ) domain containing 6	NM_152903	DOWN
	237759_at	CD48	CD48 molecule	NM_001778	DOWN
	204535_s_at	REST	RE1-silencing transcription factor	NM_005612	DOWN
	1563369_at	FLJ42957	FLJ42957 protein	NM_207436	DOWN
	1558938_at	PSME1	proteasome (prosome, macropain) activator subunit 1 (PA28 alpha)	NM_006263///NM_176783	DOWN
	217309_s_at	DSCR3	Down syndrome critical region gene 3	NM_006052	DOWN
	220105_at	RTDR1	rhabdoid tumor deletion region gene 1	NM_014433	DOWN
	225839_at	RBM33	RNA binding motif protein 33	NM_001008408	DOWN
	242776_at	ZCCHC6	zinc finger, CCHC domain containing 6	NM_024617	DOWN
	208132_x_at	BAT2	HLA-B associated transcript 2	NM_004638///NM_080686	DOWN
	226861_at	ASB8	ankyrin repeat and SOCS box-containing 8	NM_024095	DOWN
	214291_at	LOC497661	putative NFkB activating protein	NM_001035005	DOWN
	241996_at	HNRPH3	heterogeneous nuclear ribonucleoprotein H3 (2H9)	NM_012207///NM_021644	DOWN
	238851_at	ANKRD13A	ankyrin repeat domain 13A	NM_033121	DOWN
	208784_s_at	KLHDC3	kelch domain containing 3	NM_057161	DOWN
	203128_at	SPTLC2	serine palmitoyltransferase, long chain base subunit 2	NM_004863	DOWN
	215859_at	EDG6	endothelial differentiation, lysophosphatidic acid G-protein-coupled receptor, 6	NM_003775	DOWN
	200702_s_at	DDX24	DEAD (Asp-Glu-Ala-Asp) box polypeptide 24	NM_020414	DOWN
	202767_at	ACP2	acid phosphatase 2, lysosomal	NM_001610	DOWN
	225191_at	CIRBP	cold inducible RNA binding protein	NM_001280	DOWN
	222057_at	NOL12	nucleolar protein 12	NM_024313	DOWN
	236165_at	MSL3L1	male-specific lethal 3-like 1 (Drosophila)	NM_006800///NM_078628///NM_078629///NM_078630	DOWN
	204555_s_at	PPP1R3D	protein phosphatase 1, regulatory subunit 3D	NM_006242	DOWN
	241018_at	TMEM59	transmembrane protein 59	NM_004872	DOWN

## Sheet: Tableau liste genes 1
	TABLE 1. INFLAMMATORY GENES THAT ARE DIFFERENTIALLY-EXPRESSED IN STIMULATED HUMAN NEUTROPHILS (GENECHIP RESULTS)
	Affimetrix Probe number	Official Symbol	Gene name	Accession number (NCBI)	Expression
	201693_s_at	EGR1	early growth response 1	NM_001964	UP
	207850_at	CXCL3	chemokine (C-X-C motif) ligand 3; MIP-2 beta	NM_002090	UP
	210118_s_at	IL1A	interleukin 1 alpha	NM_000575	UP
	39402_at	IL1B	interleukin 1 beta	NM_000576	UP
	206359_at	SOCS3	suppressor of cytokine signaling 3	NM_003955	UP
	205476_at	CCL20	chemokine (C-C motif) ligand 20; MIP-3 alpha	NM_004591	UP
	201631_s_at	IER3	immediate early response 3	NM_003897	UP
	209457_at	DUSP5	dual specificity phosphatase 5	NM_004419	UP
	204794_at	DUSP2	dual specificity phosphatase 2	NM_004418	UP
	216243_s_at	IL1RN	interleukin 1 receptor antagonist	NM_000577///NM_173841///NM_173842///NM_173843	UP
	223217_s_at	NFKBIZ	nuclear factor of kappa light polypeptide gene enhancer in B-cells inhibitor, zeta	NM_001005474///NM_031419	UP
	203373_at	SOCS2	suppressor of cytokine signaling 2	NM_003877	UP
	223767_at	GPR84	G protein-coupled receptor 84	NM_020370	UP
	201531_at	ZFP36	zinc finger protein 36, C3H type, homolog (mouse)	NM_003407	UP
	206115_at	EGR3	early growth response 3	NM_004430	UP
	202644_s_at	TNFAIP3	tumor necrosis factor, alpha-induced protein 3	NM_006290	UP
	205114_s_at	CCL3	chemokine (C-C motif) ligand 3; MIP-1 alpha	NM_002983	UP
	205249_at	EGR2	early growth response 2 (Krox-20 homolog, Drosophila)	NM_000399	UP
	202638_s_at	ICAM1	intercellular adhesion molecule 1 (CD54), human rhinovirus receptor	NM_000201	UP
	209795_at	CD69	CD69 molecule	NM_001781	UP
	211506_s_at	IL8	interleukin 8	NM_000584	UP
	201235_s_at	BTG2	BTG family, member 2	NM_006763	UP
	1554997_a_at	PTGS2	prostaglandin-endoperoxide synthase 2 (prostaglandin G/H synthase-2; COX-2)	NM_000963	UP
	218611_at	IER5	immediate early response 5	NM_016545	UP
	201473_at	JUNB	jun B proto-oncogene	NM_002229	UP
	223377_x_at	CISH	cytokine inducible SH2-containing protein	NM_145071	UP
	204951_at	RHOH	ras homolog gene family, member H	NM_004310	UP
	209774_x_at	CXCL2	chemokine (C-X-C motif) ligand 2; MIP-2 alpha	NM_002089	UP
	207113_s_at	TNF	tumor necrosis factor (TNF superfamily, member 2)	NM_000594	UP
	213606_s_at	ARHGDIA	Rho GDP dissociation inhibitor (GDI) alpha	NM_004309	UP
	204440_at	CD83	CD83 molecule	NM_001040280///NM_004233	UP
	201502_s_at	NFKBIA	nuclear factor of kappa light polypeptide gene enhancer in B-cells inhibitor, alpha	NM_020529	UP
	206025_s_at	TNFAIP6	tumor necrosis factor, alpha-induced protein 6	NM_007115	UP
	230499_at	BIRC3	baculoviral IAP repeat-containing 3	NM_001165///NM_182962	UP
	222802_at	EDN1	endothelin 1	NM_001955	UP
	202269_x_at	GBP1	guanylate binding protein 1, interferon-inducible, 67kDa	NM_002053	UP
	202081_at	IER2	immediate early response 2	NM_004907	UP
	221345_at	FFAR2	free fatty acid receptor 2	NM_005306	UP
	221169_s_at	HRH4	histamine receptor H4	NM_021624	UP
	230170_at	OSM	oncostatin M	NM_020530	UP
	207526_s_at	IL1RL1	interleukin 1 receptor-like 1	NM_003856///NM_016232	UP
	202672_s_at	ATF3	activating transcription factor 3	NM_001030287///NM_001040619///NM_001674/// NM_004024	UP
	219371_s_at	KLF2	Kruppel-like factor 2 (lung)	NM_016270	UP
	209959_at	NR4A3	nuclear receptor subfamily 4, group A, member 3	NM_006981///NM_173198///NM_173199///NM_173200	UP
	209383_at	DDIT3	DNA-damage-inducible transcript 3	NM_004083	UP
	210549_s_at	CCL23	chemokine (C-C motif) ligand 23; MIP-3	NM_005064///NM_145898	UP
	212859_x_at	MT1E	metallothionein 1E (functional)	NM_175617	UP
	205291_at	IL2RB	interleukin 2 receptor, beta	NM_000878	UP
	212099_at	RHOB	ras homolog gene family, member B	NM_004040	UP
	201044_x_at	DUSP1	dual specificity phosphatase 1	NM_004417	UP
	207999_s_at	ADARB1	adenosine deaminase, RNA-specific, B1 (RED1 homolog rat)	NM_001033049///NM_001112///NM_015833///NM_015834	UP
	216915_s_at	PTPN12	protein tyrosine phosphatase, non-receptor type 12	NM_002835	UP
	1555214_a_at	CLEC7A	C-type lectin domain family 7, member A	NM_197954///NM_022570///NM_197947///NM_197948///NM_197949///NM_197950	UP
	201140_s_at	RAB5C	RAB5C, member RAS oncogene family	NM_004583///NM_201434	UP
	221561_at	SOAT1	sterol O-acyltransferase (acyl-Coenzyme A: cholesterol acyltransferase) 1	NM_003101	UP
	202340_x_at	NR4A1	nuclear receptor subfamily 4, group A, member 1	NM_002135///NM_173157///NM_173158	UP
	207105_s_at	PIK3R2	phosphoinositide-3-kinase, regulatory subunit 2 (p85 beta)	NM_005027	UP
	201641_at	BST2	bone marrow stromal cell antigen 2	NM_004335	DOWN
	204786_s_at	IFNAR2	interferon (alpha, beta and omega) receptor 2	NM_000874///NM_207584///NM_207585	DOWN
	201332_s_at	STAT6	signal transducer and activator of transcription 6, interleukin-4 induced	NM_003153	DOWN
	214786_at	MAP3K1	mitogen-activated protein kinase kinase kinase 1	XM_001128827///XM_042066	DOWN
	202823_at	TCEB1	transcription elongation factor B (SIII), polypeptide 1 (15kDa, elongin C)	NM_005648	DOWN
	1555514_a_at	PIAS2	protein inhibitor of activated STAT, 2	NM_004671///NM_173206	DOWN
	203523_at	LSP1	lymphocyte-specific protein 1	NM_001013253///NM_001013254///NM_001013255///NM_002339	DOWN
	205133_s_at	HSPE1	heat shock 10kDa protein 1 (chaperonin 10)	NM_002157	DOWN
	200928_s_at	RAB14	RAB14, member RAS oncogene family	NM_016322	DOWN
	207907_at	TNFSF14	tumor necrosis factor (ligand) superfamily, member 14	NM_003807///NM_172014	DOWN
	218507_at	HIG2	hypoxia-inducible protein 2	NM_013332	DOWN

## Sheet: Tableau liste genes 2
			TABLE 2. DIFFERENTIALLY-EXPRESSED GENES IN STIMULATED HUMAN NEUTROPHILS TREATED WITH ANTI-INFLAMMATORY AGENTS
			(GENECHIP RESULTS)
	Affimetrix Probe number	Official Symbol	Gene name	Expression C+ CGS	Expression C+ PGE2	Expression C+ RO+Forsk
	209959_at	NR4A3	nuclear receptor subfamily 4, group A, member 3	UP	UP	UP
	204794_at	DUSP2	dual specificity phosphatase 2	UP	UP	UP
	230170_at	OSM	oncostatin M	UP	UP	UP
	202672_s_at	ATF3	activating transcription factor 3	UP	UP	UP
	202644_s_at	TNFAIP3	tumor necrosis factor, alpha-induced protein 3	UP	UP	UP
	1554997_a_at	PTGS2	prostaglandin-endoperoxide synthase 2 (prostaglandin G/H synthase and cyclooxygenase-2)	UP	UP	UP
	206359_at	SOCS3	suppressor of cytokine signaling 3	UP	UP	UP
	201044_x_at	DUSP1	dual specificity phosphatase 1	UP	UP	UP
	205133_s_at	HSPE1	heat shock 10kDa protein 1 (chaperonin 10)	UP	UP	UP
	205476_at	CCL20	chemokine (C-C motif) ligand 20; MIP-3 alpha	UP	UP	UP
	205291_at	IL2RB	interleukin 2 receptor, beta	UP	UP	ND*
	202081_at	IER2	immediate early response 2	UP	UP	ND
	201235_s_at	BTG2	BTG family, member 2	UP	UP	ND
	207526_s_at	IL1RL1	interleukin 1 receptor-like 1	ND	ND	UP
	218611_at	IER5	immediate early response 5	ND	DOWN	ND
	201473_at	JUNB	jun B proto-oncogene	ND	ND	DOWN
	201531_at	ZFP36	zinc finger protein 36, C3H type, homolog (mouse)	DOWN	ND	DOWN
	207850_at	CXCL3	chemokine (C-X-C motif) ligand 3; MIP-2 beta	DOWN	DOWN	DOWN
	213606_s_at	ARHGDIA	Rho GDP dissociation inhibitor (GDI) alpha	DOWN	DOWN	DOWN
	221169_s_at	HRH4	histamine receptor H4	DOWN	DOWN	DOWN
	209457_at	DUSP5	dual specificity phosphatase 5	DOWN	DOWN	ND
	204440_at	CD83	CD83 molecule	DOWN	DOWN	DOWN
	205249_at	EGR2	early growth response 2 (Krox-20 homolog, Drosophila)	DOWN	DOWN	DOWN
	206115_at	EGR3	early growth response 3	DOWN	DOWN	DOWN
	205114_s_at	CCL3	chemokine (C-C motif) ligand 3; MIP-1 alpha	DOWN	DOWN	DOWN
	222802_at	EDN1	endothelin 1	DOWN	DOWN	DOWN
	223377_x_at	CISH	cytokine inducible SH2-containing protein	DOWN	DOWN	DOWN
	207113_s_at	TNF	tumor necrosis factor (TNF superfamily, member 2)	DOWN	DOWN	DOWN
						* ND= No difference

## Sheet: Table 3.
	TABLE 3. GENES REGULATED BY ANTI-INFLAMMATORY AGENTS IN STIMULATED HUMAN NEUTROPHILS
UP-REGULATED		Encoded protein, reported function(s):	Refs:
Transcription Factors:
	TNF-alpha-Induced Protein 3 (TNFAIP3)	Zinc finger protein, has been shown to inhibit NF-kappa B activation, and to prevent TLR-mediated inflammatory responses in the airway. Anti-inflammatory and anti-proliferative properties in a number of cell types.
	Activating Transcription Factor 3 (ATF3)	Member of the mammalian activation transcription factor/cAMP responsive element-binding (CREB) protein family of transcription factors. Plays a protective role in renal ischemia-reperfusion injury and in the response of human cells to ionizing radiation.
	Nuclear Receptor subfamily 4, group A3 (NR4A3; NOR1)	Orphan nuclear receptor and acts as a transcription factor that can bind to its putative coactivator, SIX3. NOR-1, along with Nur77 and Nurr1, are expressed in human atherosclerotic lesion macrophages and reduce human macrophage lipid loading and inflamma
	Immediate Early Response 2 (IER2)	Member of the regulator of G-protein signalling family; located on the cytosolic side of the plasma membrane and contains a conserved, 120 amino acid motif called the RGS domain. RGS-containing proteins attenuate the signaling activity of G-proteins by bi
Enzymes, Regulatory elements:
	Cyclooxygenase-2 (PTGS-2; COX-2)	Key enzyme in prostaglandin biosynthesis, and acts both as a dioxygenase and as a peroxidase. Expressed in a limited number of cell types and regulated by specific stimulatory events, suggesting that it is mainly responsible for the prostanoid biosynthesi
	Suppressor Of Cytokine Signaling 3 (SOCS3)	Member of the suppressor of cytokine signaling (SOCS) family, which are cytokine-inducible negative regulators of cytokine signaling. The expression of this gene is induced by various cytokines, including IL6, IL10, GM-CSF, and interferon (IFN)-gamma. The
	Dual Specificity Phosphatase 1 (DUSP1)	Member of the dual specificity protein phosphatase subfamily. Specifically inactivates mitogen-activated protein (MAP) kinase in vitro by the concomitant dephosphorylation of both its phosphothreonine and phosphotyrosine residues. Thus, DUSP1 may play an
	Dual Specificity Phosphatase 2 (DUSP2)	Member of the dual specificity protein phosphatase subfamily. Inactivates target kinases by dephosphorylating both phosphoserine/threonine and phosphotyrosine residues. DUSP2 negatively regulates members of the mitogen-activated protein (MAP) kinase sup
DOWN-REGULATED
Transcription Factors:
	Early Growth Response 2 (EGR2)	Transcriptional regulator that belongs to the EGR family of C2H2-type zinc-finger proteins. Nuclear protein and functions as a transcriptional regulator. The products of target genes it activates are required for differentitation and mitogenesis.
	Early Growth Response 3 (EGR3)	Transcriptional regulator that belongs to the EGR family of C2H2-type zinc-finger proteins. It is an immediate-early growth response gene which is induced by mitogenic stimulation. May have a role in VEGF-mediated endothelial functions leading to angiogen
Enzymes:
	Dual Specificity Phosphatase 5 (DUSP5)	Member of the dual specificity protein phosphatase subfamily. Different members of the family of dual specificity phosphatases show distinct substrate specificities for various MAP kinases, different tissue distribution and subcellular localization, and d
Receptors:
	CD83 (BL11; HB15)	Member of the immunoglobulin superfamily, CD83 has been known as one of the most characteristic cell surface markers for fully matured dendritic cells. CD83 is, however, expressed at the surface of stimulated neutrophils. An essential role for CD83 has n
Cytokines/Secreted Factors:
	Tumor Necrosis Factor-alpha (TNF-alpha)	Cytokine involved in the regulation of a wide spectrum of biological processes including cell proliferation, differentiation, apoptosis, lipid metabolism, and coagulation. TNF has been implicated in a variety of diseases, including autoimmune diseases, in
	Chemokine C-C motif Ligand 3 (CCL3; Mip-1alpha)	Macrophage inflammatory protein-1 is a so-called monokine that is involved in the acute inflammatory state in the recruitment and activation of polymorphonuclear leukocytes.
	Endothelin 1 (EDN1)	Strong vasoconstrictor which has been involved in solid organ graft failure. Has also been positively linked with inflammatory events, including pain, fever, edema, cell migration, allergies, and rheumatoid arthritis. Stimulates several activation mechani
